# Supplementary material
Source: PubMed Central journal article supplement (PMC385279)

**Table S1. Primers used for screening Salk T-DNA collection**

|             | Forward                             | Reverse                         |
|-------------|-------------------------------------|---------------------------------|
| <i>ARR3</i> | 5'ggaactagtagcaatatctctcttctatctttc | 5'cacagaggtaaactgtcacacattatttg |
| <i>ARR4</i> | 5'tttatgtgcgacacgttgatgactacttt     | 5'ggaggcgcgagagattaagggacatctat |
| <i>ARR5</i> | 5'tctctctgtgtacatttctgaaaaatggg     | 5'ctggggaaatttctaagaaaagccatgta |
| <i>ARR6</i> | 5'tgtagaagttaaatgcgtgaactccaca      | 5'gctatggtgaatcctcttgacaagtactc |
| <i>ARR8</i> | 5'caaatggctgttaaaacccaccaata        | 5'ccattgttagtggctatcacctgagtg   |
| <i>ARR9</i> | 5'ggatcccagactctttattctctctc        | 5'cccacatacaacatcatcatcatattcc  |

**Table S2. Sites of T-DNA insertions**

|             | Locus     | Site of T-DNA insertion on genomic sequence (ATG=1) |
|-------------|-----------|-----------------------------------------------------|
| <i>arr3</i> | At1g59940 | 801                                                 |
| <i>arr4</i> | At1g10470 | 817                                                 |
| <i>arr5</i> | At3g48100 | 689                                                 |
| <i>arr6</i> | At5g62920 | 1021                                                |
| <i>arr8</i> | At2g41310 | 35                                                  |
| <i>arr9</i> | At3g57040 | 782                                                 |

**Table S3. Primers for RT-PCR**

|             | Forward                  | Reverse                |
|-------------|--------------------------|------------------------|
| <i>ARR3</i> | 5'tgtcgtcggagaatgtaatga  | 5'agattccatcgaggatgtgg |
| <i>ARR8</i> | 5'tggaaacagagtcaaagttcca | 5'tgtggcgaatgtagagagtg |

**Table S4. Primers for cloning ARR promoters**

|             | Forward                              | Reverse                         |
|-------------|--------------------------------------|---------------------------------|
| <i>ARR3</i> | 5'catgtctagaactccaacacatcctttcaatagc | 5'ctttggccatcctgagaaaagagtagg   |
| <i>ARR4</i> | 5'aaagtcgacgattttatgtgacacggtt       | 5'aaactcgagagcttatagtaactgtgagg |
| <i>ARR6</i> | 5'tcgggagagagccaagcttctctaaa         | 5'tgatcaacgaatggtgaggattggaa    |
| <i>ARR8</i> | 5'aagcttgggttaatgtggggcacc           | 5'tacgtagatattcaatcgaaa         |
| <i>ARR9</i> | 5'gaattcgccgggtctaaaagtgacgagt       | 5'tgctcgagaaactgaagataacaa      |

**Figure S1. *arr* mutants display subtle morphological differences under short day conditions.**

Plants were grown in short-day conditions (8hr light, 16hr dark) for nine weeks. Four fully expanded rosette leaves from at least five plants per genotype were measured. Open bars represent total length of rosette leaves, closed bars represent % length of petioles / total leaves and error bars represent standard error, n>20.

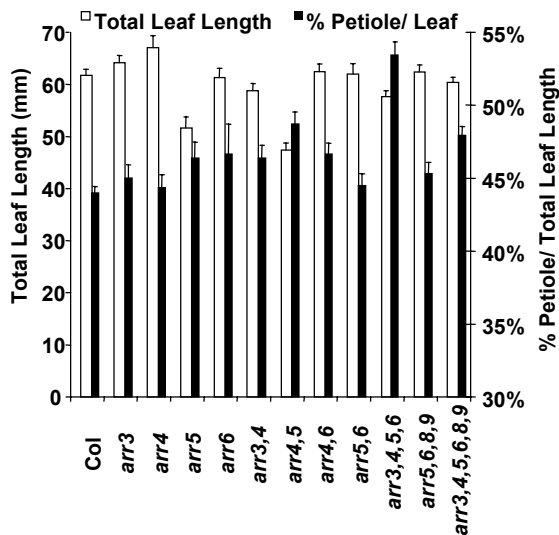

**Figure S2. *arr* mutants show increased propensity to generate shoots on low auxin: cytokinin ratios.**

Shoot initiation assays were conducted as described in methods. Photographs show all five hypocotyls of the indicated genotypes incubated on the same plate at the concentrations noted.

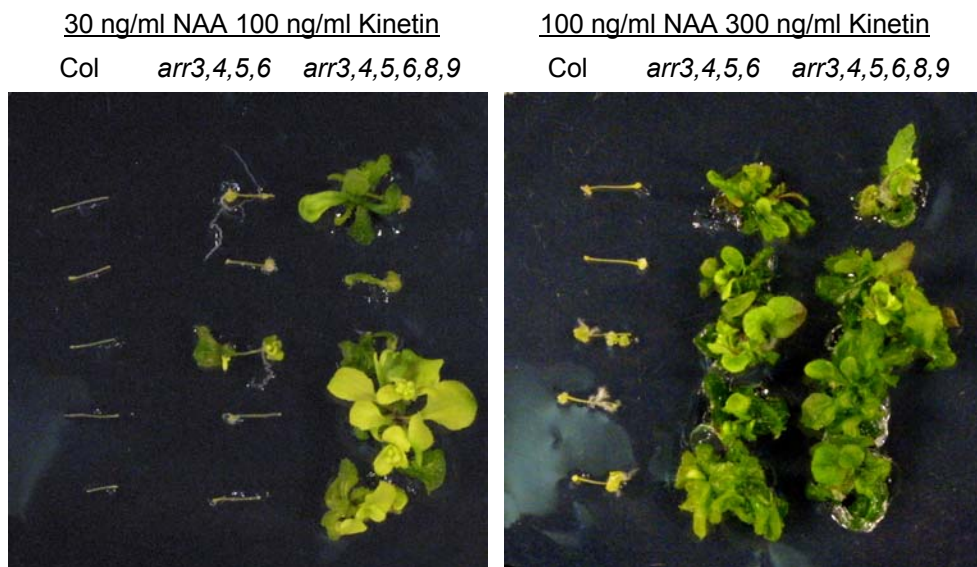

Supplement: plntcell_tpc.018978_1.pdf [file plntcell_tpc.018978_1.pdf]
